# Supplementary material
Source: PubMed Central journal article supplement (PMC6556727)

## **Supplemental Materials and Methods**

### ***Study Overview***

Participants were recruited from nephrology, cardiology, and general medicine practices/clinics. Study sites were located in Australia, Germany, the Netherlands, Romania, South Africa, the United Kingdom, and the United States. This study was conducted according to US Title 21 Code of Federal Regulations and the International Conference on Harmonisation Good Clinical Practice guidelines, as well as with the principles of the Declaration of Helsinki and its most recent updates (Fortaleza, Brazil, October 2013). All participants provided written informed consent before study participation, and an institutional review board approved the study at each site. This study was approved by both central and local institutional review boards, and participants received compensation for expenses.

### ***Study Design***

Reasons for discontinuation from the study included expected progression of chronic kidney disease requiring dialysis, transplant, or other treatment and specific protocol-mandated reasons including development of serious arrhythmias, acute heart failure, or potential hyperkalemia-related electrocardiogram changes (eg, significant increase in PR interval, widening of the QRS complex or peaked T waves, or significant corrected QT interval changes) (1) during either phase of the study.

### ***Study Drug Administration during the Maintenance Phase***

Sodium zirconium cyclosilicate (SZC) is a tasteless, odorless, crystalline compound that was orally administered before breakfast as a powder suspension in 40 mL of water with no rinses or 180 mL of water with 2–30mL rinses. SZC dosing during the maintenance phase was initiated at 5g once-daily (QD) and titrated in 5g increments or decrements guided by the protocol-specified algorithm (Supplemental Figure 1B) to maintain  $K^+$  3.5–5.0 mmol/L

measured in plasma from whole blood with a point-of-care device (i-STAT, Abbott Point of Care, Princeton, NJ). The maximum dose permitted was 15gQD and the minimum dose was 5g every other day.

### ***Clinical Laboratory Evaluations***

Samples were collected under fasting conditions (with the exception of water, coffee or tea with or without milk or sugar, and essential medications only) for  $\geq 8$  hours before sample collection. Two separate whole blood samples were collected at the same time for different  $K^+$  measurements: whole blood was collected in lithium heparin tubes for plasma  $K^+$  measurements by i-STAT and in serum separator tubes for serum  $K^+$  measurements, determined retrospectively by the central laboratory. The i-STAT  $K^+$  measurement was used to determine study eligibility, continuation to the maintenance phase, and maintenance phase SZC dose titrations, while serum  $K^+$  was used to assess treatment outcomes. During the maintenance phase, if the SZC dose was changed or stopped, or if renin–aldosterone–angiotensin system inhibitor or diuretic medications were adjusted/initiated, participants returned to the site  $7 (\pm 1)$  days later for i-STAT and serum  $K^+$  measurements.  $K^+$  measurements were taken on a weekly basis for the first month, every 4 weeks thereafter through day 365, and  $7 (\pm 1)$  days after cessation of study drug (Figure 1A). Other assessments included serum chemistry parameters (calcium, magnesium, sodium, bicarbonate, and phosphate), urinalysis (sodium, pH, albumin, creatinine, and  $K^+$ ; measured in 10 mL of urine), vital signs (pulse rate, weight, and systolic and diastolic blood pressure), and physical examinations, which were assessed at screening and follow-up visits (Figure 1A).

### ***Study End Points***

Additional post hoc exploratory i-STAT analyses included the proportions of participants who achieved mean i-STAT K<sup>+</sup>  $\leq 5.1$ ,  $\leq 5.5$ , and 3.5–5.5 mmol/L over months 3–12, mean i-STAT K<sup>+</sup> over months 3–12, 6–9, and 9–12, and absolute and percent change from correction phase baseline in i-STAT K<sup>+</sup>. For some outcomes, baseline measurements were taken only at the start of the correction phase but not repeated at initiation of the maintenance phase; therefore, correction phase baseline measurements may be used as a baseline for some maintenance phase outcomes.

Safety and tolerability were assessed by spontaneous investigator reports of adverse events (AEs) and serious AEs (categorized by Medical Dictionary for Regulatory Activities [MedDRA] version 17.0E preferred terms and standardized MedDRA queries [SMQ] for hemodynamic edema, effusions, and fluid overload), by vital signs, and by safety laboratory measurements. Resolution/recovery of SMQ events were collected from the AE case report form. Relatedness of AEs to SZC treatment was judged by the investigator.

### ***Statistical Considerations***

For all K<sup>+</sup> goal end points, available K<sup>+</sup> assessments were averaged over the given time period for each participant and then compared to the goal cut-offs. Two-sided 95% confidence intervals (CIs) for the proportion of participants achieving a specific goal were computed using an exact binomial test, while two-sided 95% CIs for mean changes from baseline were computed using a paired *t* test at each visit. Incidences of SMQ edema were summarized by the mean SZC dose that each participant received during the entire maintenance phase, categorized as  $\leq 5$  g,  $>5$  to  $\leq 10$  g, and  $>10$  g. No imputation for missing data was performed. The intention-to-treat population for the maintenance phase included all participants who received SZC and had any postbaseline K<sup>+</sup> values measured. The safety

population included all participants who received  $\geq 1$  dose of SZC and had any postbaseline follow-up for safety.

## **Supplemental Results**

### *Additional Description of Adverse Events During the Maintenance Phase*

Of the 113 participants with SMQ edema, 106 (97%) had comorbid hypertension, 96 (85%) chronic kidney disease, and 86 diabetes mellitus (76%) at baseline; 84 (74%) participants were taking RAASis, 66 (58%) calcium channel blockers, and 62 (55%) loop diuretics. The incidence of SMQ edema appeared to be less common in participants with total mean SZC exposures of  $\leq 5$  g SZC (9% [32/351]) than  $>5$  to  $\leq 10$  g SZC (18% [58/320]) or  $>10$  g SZC (31% [23/75]) for up to 12 months.

Overall, 1% of participants were hospitalized for an SMQ edema event (hospitalization rate: 1.72 per 100 participant-years). Of the SMQ edema events, 60% (68 participants; 80 events) were recorded as resolved, with another 10% (11 participants; 12 events) recorded as recovering/resolving. SMQ edema events resolved with no medication change in 4% of participants. Among participants experiencing SMQ edema events, 67/113 participants (59% of those with edema; 67/746 [9%] of the study population) required loop diuretics. Of these, 30 (27% of those with edema; 4% of the study population) were diuretic-naïve at baseline and initiated a loop diuretic to treat the event, 36 (32% of those with edema; 5% of the study population) were using loop diuretics at baseline, and for one, usage at baseline was undetermined. Of the 36 participants using diuretics at baseline who experienced an SMQ edema event, 28 (25% of those with edema; 4% of the study population) required  $\geq 1$  increase in loop diuretic dose/dosing frequency to treat the event. Two participants discontinued SZC, and one discontinued the study due to an SMQ edema event. Further interpretation of the safety data for edema may be confounded due to the lack of a placebo or active comparator

arm. However, in the previously reported 28-day, placebo-controlled HARMONIZE study, the incidence of edema (including generalized and peripheral edema) was low in participants receiving SZC 5 g (2% [1/45]), 10 g (6% [3/51]), and 15 g (14% [8/56]) and placebo (2% [2/85]) (2).

HF was experienced by 5% of participants; 3% experienced HF as a serious AE and required hospitalization for the event, resulting in a hospitalization rate of 3.6 per 100 participant-years.

Nine participants each experienced AEs of hypomagnesemia and hypocalcemia, while four participants experienced hyponatremia. Of these, one incidence of hypocalcemia was considered to be potentially clinically significant ( $<1.75$  mmol/L) (Supplemental Table 11). There were eight incidences of potentially clinically significant high values of calcium ( $>2.75$  mmol/L) and one of magnesium ( $>1.64$  mmol/L). Potentially clinically significant high serum phosphate values were observed in 23 participants (3%; Supplemental Table 11). Of these, 22 (96%) had stage 4–5 CKD at baseline; 14 participants had baseline eGFR  $<15$  mL/1.73 m<sup>2</sup> and 8 (35%) had baseline eGFR of 15– $<30$  mL/1.73 m<sup>2</sup>.

## References

1. Rossignol P, Legrand M, Kosiborod M, Hollenberg SM, Peacock WF, Emmett M, Epstein M, Kovesdy CP, Yilmaz MB, Stough WG, Gayat E, Pitt B, Zannad F, Mebazaa A: Emergency management of severe hyperkalemia: guideline for best practice and opportunities for the future. *Pharmacol Res* 113: 585–591, 2016.
2. Kosiborod M, Rasmussen HS, Lavin P, Qunibi WY, Spinowitz B, Packham D, Roger SD, Yang A, Lerma E, Singh B: Effect of sodium zirconium cyclosilicate on potassium lowering for 28 days among outpatients with hyperkalemia: the HARMONIZE randomized clinical trial. *JAMA*, 312: 2223–2233, 2014.

**Supplemental Table 1. Study sites and principal investigators by country**

| <b>Investigator Name</b> | <b>Affiliation</b>                                                                                           | <b>Location</b>                |
|--------------------------|--------------------------------------------------------------------------------------------------------------|--------------------------------|
| <b>United States</b>     |                                                                                                              |                                |
| Idalia Acosta            | San Marcus Clinical Research Clinic, Inc.                                                                    | Miami, FL                      |
| Ravindra Agarwal         | Agarwal Nephrology and Hypertension                                                                          | Columbus, GA                   |
| Rajesh Ailani            | Riverside Clinical Research, Creekside Medical Research                                                      | Edgewater, FL<br>Deland, FL    |
| Sreedhara Alla           | Northwest Louisiana Nephrology                                                                               | Shreveport, LA                 |
| German Alvarez           | Clinical Research of Brandon                                                                                 | Brandon, FL                    |
| Naveen Atray             | Capital Nephrology Medical Group                                                                             | Sacramento, CA                 |
| Diogo Belo               | California Institute of Renal Research                                                                       | Chula Vista, CA                |
| Geoffrey Block           | Denver Nephrologists                                                                                         | Denver, CO                     |
| Suzan Buxton             | Arizona Kidney Disease & Hypertension Centers Medical Research Service, LLC                                  | Peoria, AZ                     |
| Robert Cohen             | Southwest Clinical Research Institute                                                                        | Tempe, AZ                      |
| Daniel Coyne             | Chromalloy American Kidney Center<br>Washington University Center for Advanced Medicine & School of Medicine | St. Louis, MO<br>St. Louis, MO |
| Paul Crawford            | Research by Design                                                                                           | Chicago, IL                    |
| Mohamed El-Shahawy       | Academic Medical Research Institute                                                                          | Los Angeles, CA                |
| George Fadda             | California Institute of Renal Research                                                                       | Camesa, CA                     |
| Steven Fishbane          | North Shore University Hospital                                                                              | Great Neck, NY                 |
| Claude Galphin           | Southeast Renal Research Institute                                                                           | Chattanooga, TN                |
| Nirav Gandhi             | Southern California Medical Research Center                                                                  | La Palma, CA                   |
| Srinivas Hariachar       | Outcomes Research                                                                                            | Hudson, FL                     |
| Mohammad Ismail          | Mohammad Ismail, MD, Inc.                                                                                    | Paramount, CA                  |
| Younus Ismail            | Scottsboro Quick Care Clinic                                                                                 | Scottsboro, AL                 |
| Mikhail Kosiborod        | Saint Luke's Hospital of Kansas City                                                                         | Kansas City, MO                |
| Jorge Kusnir             | Florida Premier Research Institute                                                                           | Winter Park, FL                |
| Carlos Leon-Forero       | Southern Utah Kidney and Hypertension                                                                        | St. George, UT                 |
| Edouard Martin           | South Florida Research Institute                                                                             | Lauderdale Lakes, FL           |
| Moustafa                 | South Carolina Nephrology & Hypertension Center                                                              | Orangeburg, SC                 |
| Jesus Navarro            | Genesis Clinical Research                                                                                    | Tampa, FL                      |
| Pablo Pergola            | Clinical Advancement Center                                                                                  | San Antonio, TX                |
| Raymond Petrillo         | Northwest Renal Clinic                                                                                       | Portland, OR                   |

|                      |                                                                                                         |                                    |
|----------------------|---------------------------------------------------------------------------------------------------------|------------------------------------|
| Christopher Phillips | Four Rivers Clinical Research, Inc.                                                                     | Paducah, KY                        |
| Wajeh Qunibi         | University of Texas Health Science Center at San Antonio<br>University Health System Dialysis Northwest | San Antonio, TX<br>San Antonio, TX |
| Javier Ricardo       | Empire Clinical Research                                                                                | Miami Lakes, FL                    |
| John Robertson       | Apex Research of Riverside                                                                              | Riverside, CA                      |
| Douglas Shemin       | Rhode Island Hospital                                                                                   | Providence, RI                     |
| Kenneth Smith        | Clinical Research Trials of Michigan                                                                    | Chesterfield, MI                   |
| Bruce Spinowitz      | Nephrology Associates                                                                                   | Flushing, NY                       |
| Pusadee Suchinda     | Carolina Diabetes and Kidney Center                                                                     | Sumter, SC                         |
| Jalal Taslimi        | Dr Jalal Taslimi Medical Center                                                                         | Miami, FL                          |
| Bijin Thajudeen      | University of Arizona Sarver Heart Center<br>Banner – University Medical Center –South Campus           | Tucson, AZ<br>Tucson, AZ           |
| Joel Topf            | St. Clair Nephrology Research                                                                           | Roseville, MI                      |
| Theodossis Zacharis  | Creekside Clinical Research                                                                             | Deland, FL                         |

---

#### **Australia**

|               |                                  |               |
|---------------|----------------------------------|---------------|
| Steve Holt    | Royal Melbourne Hospital         | Parkville     |
| Peter Mount   | Austin Hospital                  | Heidelberg    |
| David Mudge   | Princess Alexandra Hospital      | Woolloongabba |
| David Packham | Melbourne Medical Research Group | Melbourne     |
| Simon Roger   | Renal Research                   | Gosford       |

---

#### **Europe**

|                      |                                           |                           |
|----------------------|-------------------------------------------|---------------------------|
| Johnathan Barratt    | Leicester General Hospital                | Leicester, UK             |
| Frank Dellanna       | Davita Clinical Research Deutschland GmbH | Dusseldorf,<br>Germany    |
| Wolfram Döhner       | Charité Campus Virchow-Klinikum           | Berlin, Germany           |
| Liffert Vogt         | Amsterdam Medical Center                  | Amsterdam,<br>Netherlands |
| Stephan von Haehling | Universitätsmedizin Göttingen             | Göttingen, Germany        |

---

#### **South Africa**

|                         |                                           |                |
|-------------------------|-------------------------------------------|----------------|
| Graham Ellis            | Synexus Helderberg Clinical Trials Centre | Somerset West  |
| Zelda Punt              | Phoenix Pharma                            | Port Elizabeth |
| Brian Rayner            | University of Cape Town                   | Cape Town      |
| Elane van Nieuwenhuizen | Synexus Watermeyer Clinical Research      | Pretoria       |

---

**Supplemental Table 2. Inclusion and exclusion criteria**

| Inclusion Criteria                                                                                                                                                                                                                                                                                                                                                                                                                                                                                                                                                                                                                                                                                                                                                                                                                                                                                                                                                                                                                                                                                                                                                                                                                                                                                                                                                                                                                                                                    | Exclusion Criteria                                                                                                                                                                                                                                                                                                                                                                                                                                                                                                                                                                                                                                                                                                                                                                                                                                                                                                                                                                                                                                                                                                                                                                                                                                                                                                                                                                                                                                                                                                                                                                                                                                                                                                                                                                                                                                                                                                                                                                                                                                                                                                        |
|---------------------------------------------------------------------------------------------------------------------------------------------------------------------------------------------------------------------------------------------------------------------------------------------------------------------------------------------------------------------------------------------------------------------------------------------------------------------------------------------------------------------------------------------------------------------------------------------------------------------------------------------------------------------------------------------------------------------------------------------------------------------------------------------------------------------------------------------------------------------------------------------------------------------------------------------------------------------------------------------------------------------------------------------------------------------------------------------------------------------------------------------------------------------------------------------------------------------------------------------------------------------------------------------------------------------------------------------------------------------------------------------------------------------------------------------------------------------------------------|---------------------------------------------------------------------------------------------------------------------------------------------------------------------------------------------------------------------------------------------------------------------------------------------------------------------------------------------------------------------------------------------------------------------------------------------------------------------------------------------------------------------------------------------------------------------------------------------------------------------------------------------------------------------------------------------------------------------------------------------------------------------------------------------------------------------------------------------------------------------------------------------------------------------------------------------------------------------------------------------------------------------------------------------------------------------------------------------------------------------------------------------------------------------------------------------------------------------------------------------------------------------------------------------------------------------------------------------------------------------------------------------------------------------------------------------------------------------------------------------------------------------------------------------------------------------------------------------------------------------------------------------------------------------------------------------------------------------------------------------------------------------------------------------------------------------------------------------------------------------------------------------------------------------------------------------------------------------------------------------------------------------------------------------------------------------------------------------------------------------------|
| <ul style="list-style-type: none"> <li>• Provision of written informed consent</li> <li>• Age <math>\geq 18</math> years</li> <li>• For participants outside Germany: 2 consecutive i-STAT K<sup>+</sup> values, measured 60 (<math>\pm 15</math>) minutes apart, both <math>\geq 5.1</math> mmol/L and measured within 1 day before the first dose of SZC on correction phase day 1</li> <li>• For participants in Germany: 2 consecutive i-STAT K<sup>+</sup> values, measured 60 (<math>\pm 15</math>) minutes apart, both <math>\geq 5.1</math> mmol/L and <math>\leq 6.5</math> mmol/L and measured within 1 day before the first dose of SZC on correction phase day 1</li> <li>• Ability to have repeated blood draws or effective venous catheterization</li> <li>• For participants outside the European Union: Women of childbearing potential must have had a negative pregnancy test within 1 day before the first dose of SZC on correction phase day 1 and sexually active women of childbearing potential must have been using 2 forms of medically acceptable contraception, with <math>\geq 1</math> being a barrier method</li> <li>• For participants in the European Union: Women of childbearing potential must have had a negative pregnancy test within 1 day before the first dose of SZC on correction phase day 1 and sexually active women of childbearing potential must have been using a highly effective medically acceptable contraception</li> </ul> | <ul style="list-style-type: none"> <li>• Signs and symptoms of pseudohyperkalemia</li> <li>• Treatment with lactulose, rifaximin, or other nonabsorbed antibiotics for hyperammonemia within 7 days before the first dose of SZC on correction phase day 1</li> <li>• Treatment with sodium polystyrene sulfonate or calcium polystyrene sulfonate within 3 days before the first dose of SZC on correction phase day 1</li> <li>• Life expectancy of <math>&lt; 12</math> months</li> <li>• Severely physically or mentally incapacitated and, in the opinion of the investigator, unable to perform the tasks associated with the protocol</li> <li>• Women who were pregnant, lactating, or planning to become pregnant</li> <li>• Diabetic ketoacidosis</li> <li>• Presence of any condition which, in the opinion of the investigator, placed the participant at undue risk or potentially jeopardized the quality of the data to be generated</li> <li>• Known hypersensitivity or previous anaphylaxis to SZC or to any of its components</li> <li>• Treatment with a drug or device within the last 30 days that had not received regulatory approval at the time of study entry</li> <li>• Cardiac arrhythmias that required immediate treatment</li> <li>• Undergoing dialysis</li> <li>• Randomization/enrollment in the previous ZS-002, ZS-003, ZS-004, or ZS-004E studies</li> <li>• Documented glomerular filtration rate <math>&lt; 15</math> mL/min/1.73 m<sup>2</sup> within 90 days before study entry</li> <li>• For participants in Germany: <ul style="list-style-type: none"> <li>– Participants presenting with a heart-rate corrected QT interval of 450 msec and additional risk factors for torsade de pointes (eg, heart failure or family history of long QT syndrome) and taking concomitant medications causing QT prolongation</li> <li>– Participants who were committed to an institution by virtue of an order issued either by judicial or administrative authorities</li> <li>– Participants who were dependents of the sponsor, investigator, or institution</li> </ul> </li> </ul> |

K<sup>+</sup>, potassium; SZC, sodium zirconium cyclosilicate.



***Supplemental Table 3. Concomitant medications reported by  $\geq 15\%$  of participants in the correction phase safety population<sup>a</sup>***

| <b>ATC Class, n (%)</b>                       | <b>Correction Phase (N=751)</b> |
|-----------------------------------------------|---------------------------------|
| <b>Any medication</b>                         | 732 (98)                        |
| Agents acting on the renin–angiotensin system | 476 (63)                        |
| Lipid-modifying agents                        | 459 (61)                        |
| Drugs used in diabetes                        | 423 (56)                        |
| $\beta$ -blocking agents                      | 336 (45)                        |
| Antithrombotic agents                         | 330 (44)                        |
| Vitamins                                      | 302 (40)                        |
| Diuretics                                     | 296 (39)                        |
| Analgesics                                    | 218 (29)                        |
| Drugs for acid-related disorders              | 265 (35)                        |
| Calcium channel blockers                      | 256 (34)                        |
| Antianemic preparations                       | 185 (25)                        |
| Psychoanaleptics                              | 136 (18)                        |
| Antihypertensives (other)                     | 120 (16)                        |
| Antigout preparations                         | 116 (15)                        |
| Drugs for obstructive airway diseases         | 115 (15)                        |

Note: Only agents acting on the renin–angiotensin system and diuretics during dosing with SZC are included. Diuretic use is specifically limited to ATC Level 2.

ATC, Anatomical Therapeutic Chemical; SZC, sodium zirconium cyclosilicate.

<sup>a</sup>The safety population comprised all participants who received  $\geq 1$  dose of SZC during the given study phase and had any postbaseline follow-up for safety.

**Supplemental Table 4. Change from correction phase baseline in serum bicarbonate levels in the maintenance phase safety population<sup>a</sup>**

|                                   | Overall Safety Population (N=746) |                                 |                                 | Participants With Bicarbonate Level <22 mmol/L (n=207) |                                 |                                  |
|-----------------------------------|-----------------------------------|---------------------------------|---------------------------------|--------------------------------------------------------|---------------------------------|----------------------------------|
|                                   | <i>n</i>                          | Mean (95% CI)<br>Change, mmol/L | Mean (95% CI)<br>Percent Change | <i>n</i>                                               | Mean (95% CI)<br>Change, mmol/L | Mean (95% CI)<br>Percent Change  |
| <b>CP baseline</b>                | 737                               | 23.48 (23.21–23.76)             | —                               | 207                                                    | 18.80 (18.49–19.10)             | —                                |
| <b>MP day 8</b>                   | 711                               | 0.96 (0.79–1.13) <sup>c</sup>   | 4.73 (3.95–5.52) <sup>c</sup>   | 199                                                    | 1.70 (1.39–2.02) <sup>c</sup>   | 9.42 (7.63–11.20) <sup>c</sup>   |
| <b>MP day 15</b>                  | 701                               | 1.12 (0.93–1.31) <sup>c</sup>   | 5.64 (4.74–6.55) <sup>c</sup>   | 198                                                    | 2.20 (1.82–2.58) <sup>c</sup>   | 12.15 (10.03–14.28) <sup>c</sup> |
| <b>MP day 22</b>                  | 688                               | 1.11 (0.92–1.30) <sup>c</sup>   | 5.64 (4.72–6.56) <sup>c</sup>   | 190                                                    | 2.40 (2.02–2.77) <sup>c</sup>   | 13.13 (10.97–15.30) <sup>c</sup> |
| <b>MP day 29</b>                  | 683                               | 1.21 (1.01–1.42) <sup>c</sup>   | 6.17 (5.20–7.14) <sup>c</sup>   | 192                                                    | 2.51 (2.13–2.88) <sup>c</sup>   | 13.90 (11.71–16.08) <sup>c</sup> |
| <b>MP day 57</b>                  | 657                               | 1.11 (0.90–1.33) <sup>c</sup>   | 5.76 (4.75–6.76) <sup>c</sup>   | 182                                                    | 2.49 (2.07–2.91) <sup>c</sup>   | 13.61 (11.32–15.91) <sup>c</sup> |
| <b>MP day 85</b>                  | 631                               | 1.17 (0.93–1.40) <sup>c</sup>   | 6.06 (4.94–7.18) <sup>c</sup>   | 169                                                    | 2.77 (2.29–3.25) <sup>c</sup>   | 15.12 (12.37–17.87) <sup>c</sup> |
| <b>MP day 176</b>                 | 577                               | 1.22 (0.97–1.46) <sup>c</sup>   | 6.21 (5.08–7.33) <sup>c</sup>   | 147                                                    | 2.82 (2.37–3.28) <sup>c</sup>   | 15.49 (12.90–18.08) <sup>c</sup> |
| <b>MP day 267</b>                 | 511                               | 0.76 (0.50–1.03) <sup>c</sup>   | 4.13 (2.96–5.31) <sup>c</sup>   | 122                                                    | 2.28 (1.77–2.79) <sup>c</sup>   | 12.38 (9.57–15.19) <sup>c</sup>  |
| <b>MP day 365</b>                 | 432                               | 0.77 (0.49–1.06) <sup>c</sup>   | 4.29 (2.99–5.59) <sup>c</sup>   | 100                                                    | 2.57 (1.98–3.16) <sup>c</sup>   | 14.35 (10.99–17.71) <sup>c</sup> |
| <b>MP day 365/EOS<sup>b</sup></b> | 725                               | 0.96 (0.73–1.18) <sup>c</sup>   | 5.20 (4.13–6.26) <sup>c</sup>   | 203                                                    | 2.63 (2.18–3.07) <sup>c</sup>   | 14.47 (12.03–16.90) <sup>c</sup> |

CI, confidence interval; CP, correction phase; EOS, end of study; MP, maintenance phase.

<sup>a</sup>The safety population comprised all participants who received ≥1 dose of sodium zirconium cyclosilicate during the given study phase and had any postbaseline follow-up for safety.

<sup>b</sup>Day 365/EOS represents the last scheduled study visit day (± 1 day) while on study drug.

<sup>c</sup>*P*≤0.001 vs CP baseline.

***Supplemental Table 5. Adverse events that occurred in any participant in the correction phase safety population<sup>a</sup>***

| <b>MedDRA Preferred Term, n (%)</b> | <b>Correction Phase (N=751)</b> |
|-------------------------------------|---------------------------------|
| <b>Any adverse event</b>            | 31 (4)                          |
| Abdominal distension                | 1 (0.1)                         |
| Abdominal pain upper                | 1 (0.1)                         |
| Alcohol abuse                       | 1 (0.1)                         |
| Arthropod bite                      | 1 (0.1)                         |
| Back pain                           | 1 (0.1)                         |
| Cellulitis                          | 1 (0.1)                         |
| Constipation                        | 2 (0.3)                         |
| Diarrhea                            | 2 (0.3)                         |
| Edema peripheral                    | 1 (0.1)                         |
| Flank pain                          | 1 (0.1)                         |
| Flatulence                          | 1 (0.1)                         |
| Foreign body sensation in eyes      | 1 (0.1)                         |
| Headache                            | 1 (0.1)                         |
| Hyperesthesia                       | 1 (0.1)                         |
| Hyperglycemia                       | 1 (0.1)                         |
| Hypertension                        | 1 (0.1)                         |
| Infection                           | 1 (0.1)                         |
| Keratitis                           | 1 (0.1)                         |
| Malaise                             | 1 (0.1)                         |
| Migraine                            | 1 (0.1)                         |
| Muscle spasms                       | 1 (0.1)                         |
| Myopia                              | 1 (0.1)                         |
| Nasal congestion                    | 1 (0.1)                         |
| Nausea                              | 4 (0.5)                         |
| Pain                                | 1 (0.1)                         |

| <b>MedDRA Preferred Term, <i>n</i> (%)</b> | <b>Correction Phase (<i>N</i>=751)</b> |
|--------------------------------------------|----------------------------------------|
| Pain in extremity                          | 1 (0.1)                                |
| Palpitations                               | 1 (0.1)                                |
| Pruritus                                   | 1 (0.1)                                |
| Renal failure acute                        | 1 (0.1)                                |
| Sinusitis                                  | 1 (0.1)                                |
| Skin ulcer                                 | 1 (0.1)                                |
| Type 2 diabetes mellitus                   | 1 (0.1)                                |
| Urinary incontinence                       | 1 (0.1)                                |
| Urinary tract infection                    | 4 (0.5)                                |

MedDRA, Medical Dictionary for Regulatory Activities.

<sup>a</sup>The safety population comprised all participants who received  $\geq 1$  dose of sodium zirconium cyclosilicate during the given study phase and had any postbaseline follow-up for safety.

***Supplemental Table 6. Adverse events that occurred in  $\geq 1\%$  of participants in the maintenance phase safety population<sup>a</sup>***

| <b>MedDRA Preferred Term, n (%)</b> | <b>Maintenance Phase (N=746)</b> |
|-------------------------------------|----------------------------------|
| <b>Any adverse event</b>            | 489 (66)                         |
| Anemia                              | 44 (6)                           |
| Arthralgia                          | 19 (3)                           |
| Atrial fibrillation                 | 12 (2)                           |
| Back pain                           | 11 (2)                           |
| Blood creatinine increased          | 9 (1)                            |
| Bronchitis                          | 18 (2)                           |
| Cardiac failure congestive          | 24 (3)                           |
| Cardiac murmur                      | 16 (2)                           |
| Cellulitis                          | 21 (3)                           |
| Chest pain                          | 28 (4)                           |
| Constipation                        | 48 (6)                           |
| Cough                               | 22 (3)                           |
| Diarrhea                            | 33 (4)                           |
| Dizziness                           | 17 (2)                           |
| Dyspnea                             | 31 (4)                           |
| Edema                               | 15 (2)                           |
| Edema peripheral                    | 72 (10)                          |
| Fall                                | 22 (3)                           |
| Fatigue                             | 14 (2)                           |
| Fluid overload                      | 12 (2)                           |
| Gout                                | 18 (2)                           |
| Headache                            | 23 (3)                           |
| Hyperglycemia                       | 10 (1)                           |
| Hyperkalemia                        | 19 (3)                           |
| Hyperphosphatemia                   | 14 (2)                           |
| Hypertension                        | 82 (11)                          |
| Hypocalcemia                        | 9 (1)                            |
| Hypoglycemia                        | 14 (2)                           |

| <b>MedDRA Preferred Term, <i>n</i> (%)</b> | <b>Maintenance Phase (<i>N</i>=746)</b> |
|--------------------------------------------|-----------------------------------------|
| Hypokalemia                                | 11 (2)                                  |
| Hypomagnesemia                             | 9 (1)                                   |
| Hypotension                                | 10 (1)                                  |
| Influenza                                  | 10 (1)                                  |
| Insomnia                                   | 8 (1)                                   |
| Local swelling                             | 12 (2)                                  |
| Metabolic acidosis                         | 11 (2)                                  |
| Muscle spasms                              | 23 (3)                                  |
| Musculoskeletal pain                       | 9 (1)                                   |
| Nasopharyngitis                            | 19 (3)                                  |
| Nausea                                     | 56 (8)                                  |
| Osteomyelitis                              | 12 (2)                                  |
| Pain                                       | 14 (2)                                  |
| Pain in extremity                          | 17 (2)                                  |
| Pneumonia                                  | 24 (3)                                  |
| Pruritus                                   | 8 (1)                                   |
| Pyrexia                                    | 8 (1)                                   |
| Rales                                      | 12 (2)                                  |
| Rash                                       | 10 (1)                                  |
| Renal failure acute                        | 33 (4)                                  |
| Renal failure chronic                      | 12 (2)                                  |
| Sinusitis                                  | 15 (2)                                  |
| Skin ulcer                                 | 19 (3)                                  |
| Upper respiratory tract infection          | 37 (5)                                  |
| Urinary tract infection                    | 59 (8)                                  |
| Vertigo                                    | 8 (1)                                   |
| Vitamin D deficiency                       | 8 (1)                                   |
| Vomiting                                   | 36 (5)                                  |

MedDRA, Medical Dictionary for Regulatory Activities.

<sup>a</sup>The safety population comprised all participants who received  $\geq 1$  dose of sodium zirconium cyclosilicate during the given study phase and had any postbaseline follow-up for safety.

***Supplemental Table 7. Adverse events that occurred within the hemodynamic edema, effusions, and fluid overload SMQ in the maintenance phase safety population (N=746)<sup>a</sup>***

| <b>Hemodynamic Edema, Effusions, and Fluid Overload<br/>SMQ Preferred Term</b> | <b>Participants, n (%)</b>  | <b>Number of Events</b> |
|--------------------------------------------------------------------------------|-----------------------------|-------------------------|
| <b>Any adverse event<sup>b</sup></b>                                           | <b>113 (15)<sup>c</sup></b> | <b>139</b>              |
| Ascites                                                                        | 1 (0.1)                     | 1                       |
| Edema                                                                          | 15 (2)                      | 16                      |
| Fluid overload                                                                 | 12 (2)                      | 13                      |
| Fluid retention                                                                | 1 (0.1)                     | 1                       |
| Generalized edema                                                              | 4 (0.5)                     | 4                       |
| Local swelling                                                                 | 12 (2)                      | 13                      |
| Pericardial effusion                                                           | 1 (0.1)                     | 1                       |
| Peripheral edema                                                               | 72 (10)                     | 84                      |
| Pleural effusion                                                               | 3 (0.4)                     | 3                       |
| Pulmonary edema                                                                | 3 (0.4)                     | 3                       |

SMQ, standardized Medical Dictionary for Regulatory Activities query.

<sup>a</sup>The safety population comprised all participants who received  $\geq 1$  dose of sodium zirconium cyclosilicate during the given study phase and had any postbaseline follow-up for safety. <sup>b</sup>Individual preferred term adverse events were not mutually exclusive.

<sup>c</sup>Participants who reported more than 1 event during the maintenance phase were counted only once in the total number of participants reporting any event.

**Supplemental Table 8. Correction phase<sup>a</sup> baseline characteristics and demographics stratified by participants who did or did not experience an adverse event within the hemodynamic edema, effusions, and fluid overload SMQ during the maintenance phase**

| Characteristic                                                 | Edema SMQ Population <sup>b</sup><br>(n=113) | Non-Edema Population<br>(n=638) |
|----------------------------------------------------------------|----------------------------------------------|---------------------------------|
| <b>Age, years, mean (SD)</b>                                   | 67 (12)                                      | 63 (13)                         |
| <b>Age category, years</b>                                     |                                              |                                 |
| <65                                                            | 47 (42)                                      | 331 (52)                        |
| ≥65                                                            | 66 (58)                                      | 307 (48)                        |
| <b>Sex</b>                                                     |                                              |                                 |
| Male                                                           | 70 (62)                                      | 378 (59)                        |
| Female                                                         | 43 (38)                                      | 260 (41)                        |
| <b>Race</b>                                                    |                                              |                                 |
| White                                                          | 85 (75)                                      | 539 (85)                        |
| Black/African American                                         | 20 (18)                                      | 69 (11)                         |
| Asian                                                          | 4 (4)                                        | 21 (3)                          |
| Other                                                          | 4 (4)                                        | 9 (1)                           |
| <b>Ethnicity</b>                                               |                                              |                                 |
| Hispanic                                                       | 24 (21)                                      | 296 (46)                        |
| Non-Hispanic                                                   | 89 (79)                                      | 342 (54)                        |
| <b>Geographic region</b>                                       |                                              |                                 |
| United States                                                  | 88 (80)                                      | 551 (86)                        |
| Other countries <sup>c</sup>                                   | 25 (22)                                      | 87 (14)                         |
| <b>Weight, kg</b>                                              |                                              |                                 |
| <85                                                            | 52 (46)                                      | 354 (56)                        |
| ≥85                                                            | 59 (52)                                      | 283 (44)                        |
| Missing                                                        | 2 (2)                                        | 1 (0.2)                         |
| <b>Blood pressure, mm Hg, mean (95% CI)</b>                    |                                              |                                 |
| Systolic                                                       | 144.7 (140.7–148.6)                          | 133.9 (132.5–135.4)             |
| Diastolic                                                      | 76.4 (74.1–78.7)                             | 77.2 (76.4–78.0)                |
| <b>Serum K<sup>+</sup>, mmol/L, mean (min–max)<sup>d</sup></b> | 5.7 (4.6–7.6)                                | 5.6 (4.0–7.3)                   |
| <b>Serum K<sup>+</sup>, mmol/L</b>                             |                                              |                                 |



| Characteristic                                                  | Edema SMQ Population <sup>b</sup><br>(n=113) | Non-Edema Population<br>(n=638) |
|-----------------------------------------------------------------|----------------------------------------------|---------------------------------|
| 5.1 to <5.5                                                     | 23 (20)                                      | 214 (34)                        |
| 5.5 to <6.0                                                     | 62 (55)                                      | 276 (43)                        |
| ≥6.0                                                            | 25 (22)                                      | 101 (16)                        |
| <b>i-STAT K<sup>+</sup>, mmol/L, mean (min–max)<sup>d</sup></b> | 5.6 (5.1–6.5)                                | 5.5 (5.1–7.3)                   |
| <b>i-STAT K<sup>+</sup>, mmol/L</b>                             |                                              |                                 |
| 5.1 to <5.5                                                     | 48 (43)                                      | 349 (55)                        |
| 5.5 to <6.0                                                     | 52 (46)                                      | 224 (35)                        |
| ≥6.0                                                            | 13 (12)                                      | 65 (10)                         |
| <b>eGFR, mL/min/1.73 m<sup>2</sup>, mean (SD)</b>               | 31 (14)                                      | 50 (33)                         |
| <b>eGFR, mL/min/1.73 m<sup>2</sup></b>                          |                                              |                                 |
| <15                                                             | 7 (6)                                        | 39 (6)                          |
| 15 to <30                                                       | 53 (50)                                      | 190 (30)                        |
| 30 to <45                                                       | 40 (35)                                      | 133 (21)                        |
| 45 to <60                                                       | 7 (6)                                        | 83 (13)                         |
| ≥60                                                             | 4 (4)                                        | 186 (29)                        |
| Not reported                                                    | 2 (2)                                        | 7 (1)                           |
| <b>Comorbidity</b>                                              |                                              |                                 |
| Chronic kidney disease                                          | 96 (85)                                      | 390 (61)                        |
| Diabetes mellitus                                               | 86 (76)                                      | 391 (61)                        |
| Heart failure                                                   | 28 (25)                                      | 84 (13)                         |
| Hyperkalemia <sup>e</sup>                                       | 69 (61)                                      | 352 (55)                        |
| Hypertension                                                    | 106 (94)                                     | 516 (81)                        |
| <b>Concomitant medication use</b>                               |                                              |                                 |
| RAASi therapy                                                   | 84 (74)                                      | 401 (63)                        |
| ACE inhibitors                                                  | 49 (43)                                      | 289 (45)                        |
| ARBs                                                            | 37 (33)                                      | 119 (19)                        |
| MRAs                                                            | 10 (9)                                       | 35 (6)                          |
| Diuretics                                                       | 72 (64)                                      | 225 (35)                        |
| Calcium channel blockers                                        | 66 (58)                                      | 191 (30)                        |
| β-blockers                                                      | 78 (69)                                      | 279 (44)                        |

Values are *n* (%) unless otherwise specified.

ACE, angiotensin-converting enzyme; ARBs, angiotensin II receptor blockers; CI, confidence interval; eGFR, estimated glomerular filtration rate; K<sup>+</sup>, potassium; MRAs, mineralocorticoid receptor antagonists; RAASi, renin–angiotensin–aldosterone system inhibitor; SD, standard deviation; SMQ, standardized Medical Dictionary for Regulatory Activities query.

<sup>a</sup>The safety population comprised all participants who received  $\geq 1$  dose of sodium zirconium cyclosilicate during the given study phase and had any postbaseline follow-up for safety.

<sup>b</sup>Preferred terms included in the edema SMQ were ascites, fluid overload, fluid retention, generalized edema, local swelling, edema, edema peripheral, pericardial effusion, pleural effusion, and pulmonary edema.

<sup>c</sup>Centers in Australia, Europe, and South Africa.

<sup>d</sup>At correction phase baseline where K<sup>+</sup> was the mean of 2 different pretreatment K<sup>+</sup> values, recorded 60 ( $\pm 15$ ) minutes apart on correction phase day 1.

<sup>e</sup>Includes participants with “hyperkalemia” or “blood potassium increased.”

**Supplemental Table 9. Serious adverse events that occurred in  $\geq 2$  participants in the maintenance phase safety population<sup>a</sup>**

| <b>MedDRA Preferred Term, n (%)</b>   | <b>Maintenance Phase (N=746)</b> |
|---------------------------------------|----------------------------------|
| <b>Any serious adverse event</b>      | 161 (22)                         |
| Acute myocardial infarction           | 6 (0.8)                          |
| Acute respiratory failure             | 5 (0.7)                          |
| Anemia                                | 2 (0.3)                          |
| Angina unstable                       | 3 (0.4)                          |
| Asthenia                              | 2 (0.3)                          |
| Atrial fibrillation                   | 3 (0.4)                          |
| Bronchitis                            | 3 (0.4)                          |
| Cardiac failure                       | 4 (0.5)                          |
| Cardiac failure congestive            | 11 (2)                           |
| Cellulitis                            | 7 (0.9)                          |
| Cerebrovascular accident              | 3 (0.4)                          |
| Chest pain                            | 11 (2)                           |
| Cholecystitis                         | 2 (0.3)                          |
| Chronic obstructive pulmonary disease | 3 (0.4)                          |
| Constipation                          | 2 (0.3)                          |
| Dehydration                           | 2 (0.3)                          |
| Diabetic foot                         | 2 (0.3)                          |
| Dyspnea                               | 5 (0.7)                          |
| Fluid overload                        | 3 (0.4)                          |
| Gangrene                              | 2 (0.3)                          |
| Hyperkalemia                          | 4 (0.5)                          |
| Hypertension                          | 4 (0.5)                          |
| Hypoglycemia                          | 4 (0.5)                          |
| Lobar pneumonia                       | 3 (0.4)                          |
| Myocardial infarction                 | 3 (0.4)                          |
| Osteomyelitis                         | 8 (1)                            |
| Peptic ulcer                          | 2 (0.3)                          |
| Pneumonia                             | 14 (2)                           |
| Pulmonary edema                       | 3 (0.4)                          |

| <b>MedDRA Preferred Term, <i>n</i> (%)</b> | <b>Maintenance Phase (<i>N</i>=746)</b> |
|--------------------------------------------|-----------------------------------------|
| Renal failure acute                        | 8 (1)                                   |
| Renal failure chronic                      | 4 (0.5)                                 |
| Respiratory failure                        | 3 (0.4)                                 |
| Sepsis                                     | 3 (0.4)                                 |
| Skin ulcer                                 | 4 (0.5)                                 |
| Syncope                                    | 2 (0.3)                                 |
| Transient ischemic attack                  | 2 (0.3)                                 |
| Troponin increased                         | 2 (0.3)                                 |
| Urinary tract infection                    | 4 (0.5)                                 |
| Ventricular tachycardia                    | 2 (0.3)                                 |

MedDRA, Medical Dictionary for Regulatory Activities.

<sup>a</sup>The safety population comprised all participants who received  $\geq 1$  dose of sodium zirconium cyclosilicate during the given study phase and had any postbaseline follow-up for safety.

**Supplemental Table 10. Adverse events that led to treatment discontinuation during the maintenance phase safety population<sup>a</sup>**

| MedDRA Preferred Term, n (%)                        | Maintenance Phase (N=746) |
|-----------------------------------------------------|---------------------------|
| <b>Any adverse event leading to discontinuation</b> | 102 (14)                  |
| Acute myocardial infarction                         | 3 (0.4)                   |
| Acute respiratory failure                           | 1 (0.1)                   |
| Ankle fracture                                      | 1 (0.1)                   |
| Arthralgia                                          | 1 (0.1)                   |
| Atrial fibrillation                                 | 4 (0.5)                   |
| Atrial flutter                                      | 1 (0.1)                   |
| Azotemia                                            | 1 (0.1)                   |
| Breast cancer                                       | 1 (0.1)                   |
| Cardiac arrest                                      | 1 (0.1)                   |
| Cardiac failure                                     | 4 (0.5)                   |
| Cardiac failure acute                               | 1 (0.1)                   |
| Cardiac failure congestive                          | 11 (2)                    |
| Cardiomyopathy                                      | 1 (0.1)                   |
| Chest pain                                          | 3 (0.4)                   |
| Chondrocalcinosis pyrophosphate                     | 1 (0.1)                   |
| Constipation                                        | 2 (0.3)                   |
| Cystitis hemorrhagic                                | 1 (0.1)                   |
| Dehydration                                         | 1 (0.1)                   |
| Delirium                                            | 1 (0.1)                   |
| Dependence on enabling machine or device            | 1 (0.1)                   |
| Diarrhea                                            | 2 (0.3)                   |
| Dizziness                                           | 1 (0.1)                   |
| Drug dose omission                                  | 1 (0.1)                   |
| Dyspnea                                             | 5 (0.7)                   |
| Electrocardiogram abnormal                          | 2 (0.3)                   |
| Eosinophil count increased                          | 1 (0.1)                   |
| Fluid overload                                      | 2 (0.3)                   |
| Gastric ulcer                                       | 1 (0.1)                   |
| Gastritis                                           | 1 (0.1)                   |

|                                         |         |
|-----------------------------------------|---------|
| Gastrointestinal necrosis               | 1 (0.1) |
| Gout                                    | 1 (0.1) |
| Headache                                | 1 (0.1) |
| Heart injury                            | 1 (0.1) |
| Hematuria                               | 1 (0.1) |
| Hypercapnia                             | 1 (0.1) |
| Hyperkalemia                            | 3 (0.4) |
| Hypokalemia                             | 1 (0.1) |
| Interstitial lung disease               | 1 (0.1) |
| Libido decreased                        | 1 (0.1) |
| Lobar pneumonia                         | 1 (0.1) |
| Mental status changes                   | 1 (0.1) |
| Monocyte count increased                | 1 (0.1) |
| Multiple sclerosis                      | 1 (0.1) |
| Muscle spasms                           | 1 (0.1) |
| Myocardial infarction                   | 3 (0.4) |
| Nausea                                  | 1 (0.1) |
| Neutrophil count decreased              | 1 (0.1) |
| Osteomyelitis                           | 4 (0.5) |
| Palpitations                            | 1 (0.1) |
| Pancreatitis acute                      | 1 (0.1) |
| Pancreatitis chronic                    | 1 (0.1) |
| Peptic ulcer                            | 1 (0.1) |
| Pericarditis uremic                     | 1 (0.1) |
| Peripheral edema                        | 1 (0.1) |
| Pharyngitis                             | 1 (0.1) |
| Pneumonia                               | 2 (0.3) |
| Pneumonia cryptococcal                  | 1 (0.1) |
| Presyncope                              | 1 (0.1) |
| Prostatic-specific antigen increased    | 1 (0.1) |
| Pulmonary mass                          | 2 (0.3) |
| Pulmonary physical examination abnormal | 1 (0.1) |
| Rash                                    | 1 (0.1) |
| Renal failure acute                     | 9 (1)   |

|                            |         |
|----------------------------|---------|
| Renal failure chronic      | 6 (0.8) |
| Renal transplant           | 1 (0.1) |
| Respiratory failure        | 1 (0.1) |
| Sciatica                   | 1 (0.1) |
| Staphylococcal sepsis      | 1 (0.1) |
| Toxicity to various agents | 1 (0.1) |
| Troponin increased         | 1 (0.1) |
| Urosepsis                  | 1 (0.1) |
| Venous insufficiency       | 1 (0.1) |
| Ventricular tachycardia    | 2 (0.3) |
| Vomiting                   | 4 (0.5) |
| White blood cell decreased | 1 (0.1) |

---

MedDRA, Medical Dictionary for Regulatory Activities.

<sup>a</sup>The safety population comprised all participants who received  $\geq 1$  dose of sodium zirconium cyclosilicate during the given study phase and had any postbaseline follow-up for safety.

**Supplemental Table 11. Serum laboratory values in the maintenance phase safety population (N=746)<sup>a</sup>**

|                          | Mean (95% CI)<br>at CP Baseline | Mean (95% CI) Change From CP Baseline |                          | Potentially Clinically Significant Values, n (%) <sup>c,d</sup> |         |          |
|--------------------------|---------------------------------|---------------------------------------|--------------------------|-----------------------------------------------------------------|---------|----------|
|                          |                                 | Day 29                                | Day 365/EOS <sup>b</sup> | Low                                                             | High    | Total    |
| <b>Magnesium, mmol/L</b> | 0.81 (0.80–0.82)                | –0.01 (–0.01 to 0.00)                 | 0.01 (0.00–0.01)         | 0 (0.0)                                                         | 1 (0.1) | 727 (98) |
| <b>Calcium, mmol/L</b>   | 2.31 (2.30–2.33)                | 0.02 (0.01–0.04)                      | –0.01 (–0.02 to 0.01)    | 1 (0.1)                                                         | 8 (1)   | 726 (97) |
| <b>Sodium, mmol/L</b>    | 138.4 (138.1–138.7)             | 0.7 (0.4–1.0)                         | 0.2 (–0.1 to 0.5)        | 0 (0.0)                                                         | 0 (0.0) | 727 (98) |
| <b>Phosphate, mmol/L</b> | 1.18 (1.16–1.20)                | 0.03 (0.02–0.05)                      | 0.07 (0.05–0.09)         | 0 (0.0)                                                         | 23 (3)  | 727 (98) |

CI, confidence interval; CP, correction phase; EOS, end of study.

<sup>a</sup>The safety population comprised all participants who received  $\geq 1$  dose of sodium zirconium cyclosilicate during the given study phase and had any postbaseline follow-up for safety.

<sup>b</sup>Day 365/EOS represents the last scheduled study visit day ( $\pm 1$  day) while on study drug.

<sup>c</sup>Potentially clinically significant shifts from CP baseline to maximum follow-up.

<sup>d</sup>Magnesium (low  $< 0.37$  mmol/L; high  $> 1.64$  mmol/L); calcium (low  $< 1.75$  mmol/L; high  $> 2.75$  mmol/L); sodium (low  $< 120$  mmol/L; high  $> 160$  mmol/L); phosphate (low  $< 0.65$  mmol/L; high  $> 2.10$  mmol/L).



**Supplemental Table 12. Urine laboratory parameters in the maintenance phase safety population<sup>a</sup>**

|                                      | CP Baseline            | MP Day 85                | MP Day 176                 | MP Day 365                   |
|--------------------------------------|------------------------|--------------------------|----------------------------|------------------------------|
| <b>Potassium, mmol/L</b>             |                        |                          |                            |                              |
| <i>N</i>                             | 515                    | 437                      | 378                        | 271                          |
| Mean (95% CI)                        | 50.2 (47.5–53.0)       | 38.6 (36.3–41.0)         | 38.9 (36.3–41.5)           | 40.5 (37.5–43.5)             |
| <b>Sodium, mmol/L</b>                |                        |                          |                            |                              |
| <i>N</i>                             | 515                    | 437                      | 378                        | 271                          |
| Mean (95% CI)                        | 93.7 (89.6–97.8)       | 99.1 (94.8–103.4)        | 100.3 (95.6–105.0)         | 101.5 (96.1–106.9)           |
| <b>pH</b>                            |                        |                          |                            |                              |
| <i>N</i>                             | 735                    | 630                      | 576                        | 433                          |
| Mean (95% CI)                        | 5.92 (5.87–5.97)       | 5.90 (5.85–5.94)         | 5.87 (5.82–5.92)           | 5.83 (5.78–5.88)             |
| <b>Creatinine, μmol/L</b>            |                        |                          |                            |                              |
| <i>N</i>                             | 515                    | 437                      | 378                        | 271                          |
| Mean (95% CI)                        | 8592.2 (8209.8–8974.6) | 9648.2 (9156.4–10,139.9) | 10,011.4 (9487.4–10,535.5) | 10,741.6 (10,117.4–11,365.8) |
| <b>Albumin, μmol/L</b>               |                        |                          |                            |                              |
| <i>N</i>                             | 515                    | 437                      | 378                        | 271                          |
| Mean (95% CI)                        | 6.2 (5.1–7.3)          | 8.7 (7.2–10.3)           | 8.2 (6.6–9.8)              | 9.7 (7.3–12.1)               |
| <b>Potassium-to-creatinine ratio</b> |                        |                          |                            |                              |
| <i>N</i>                             | 515                    | 437                      | 378                        | 270                          |
| Mean (95% CI)                        | 0.62 (0.57–0.67)       | 0.38 (0.37–0.40)         | 0.37 (0.35–0.39)           | 0.35 (0.33–0.37)             |
| <b>Sodium-to-creatinine ratio</b>    |                        |                          |                            |                              |
| <i>N</i>                             | 515                    | 437                      | 378                        | 270                          |
| Mean (95% CI)                        | 1.18 (1.12–1.25)       | 1.11 (1.05–1.18)         | 1.11 (1.03–1.19)           | 1.02 (0.94–1.10)             |

CI, confidence interval; CP, correction phase; MP, maintenance phase.

<sup>a</sup>The safety population comprised all participants who received ≥1 dose of sodium zirconium cyclosilicate during the given study phase and had any postbaseline follow-up for safety.

**Supplemental Figure 1. Dose titration algorithm.**

<sup>a</sup>Participants who achieved normokalemia ( $K^+$  3.5–5.0 mmol/L) as measured by the point-of-care device i-STAT at any point during the correction phase were immediately eligible to enter the 12-month maintenance phase and received 5 g once daily treatment with SZC. <sup>b</sup>Drug to be discontinued if  $K^+$  <3.0 or >6.5 mmol/L at any time. <sup>c</sup>Based on i-STAT  $K^+$  value at visit. <sup>d</sup>If i-STAT  $K^+$  >5.5 mmol/L.  $K^+$ , potassium; QD, once daily; QoD, every other day; SZC, sodium zirconium cyclosilicate.

| <b>Correction Phase</b>                                                                          | <b>Maintenance Phase</b>                       |                         |                     |                                  |                   |
|--------------------------------------------------------------------------------------------------|------------------------------------------------|-------------------------|---------------------|----------------------------------|-------------------|
| Participants received SZC 10 g TID until i-STAT $K^+$ 3.5–5.0 mmol/L was achieved <sup>a,b</sup> | <b>Observed <math>K^{+c}</math><br/>mmol/L</b> | <b>Current SZC Dose</b> |                     |                                  |                   |
|                                                                                                  |                                                | <b>5 g QoD</b>          | <b>5 g QD</b>       | <b>10 g QD</b>                   | <b>15 QD</b>      |
|                                                                                                  | 3.0 to 3.4 <sup>b</sup>                        | Discontinue             | Reduce to 5 g QoD   | Reduce to 5 g QD                 | Reduce to 10 g QD |
|                                                                                                  | 3.5 to 5.0                                     | No change               | No change           | No change                        | No change         |
|                                                                                                  | >5.0 to 6.5                                    | Increase to 5 g QD      | Increase to 10 g QD | Increase to 15 g QD <sup>d</sup> | No change         |

**Supplemental Figure 2. Time from baseline to study discontinuation for any reason in the maintenance phase safety population.<sup>a</sup>**

<sup>a</sup>The safety population comprised all participants who received  $\geq 1$  dose of sodium zirconium cyclosilicate during the given study phase and had any post-baseline follow-up for safety.

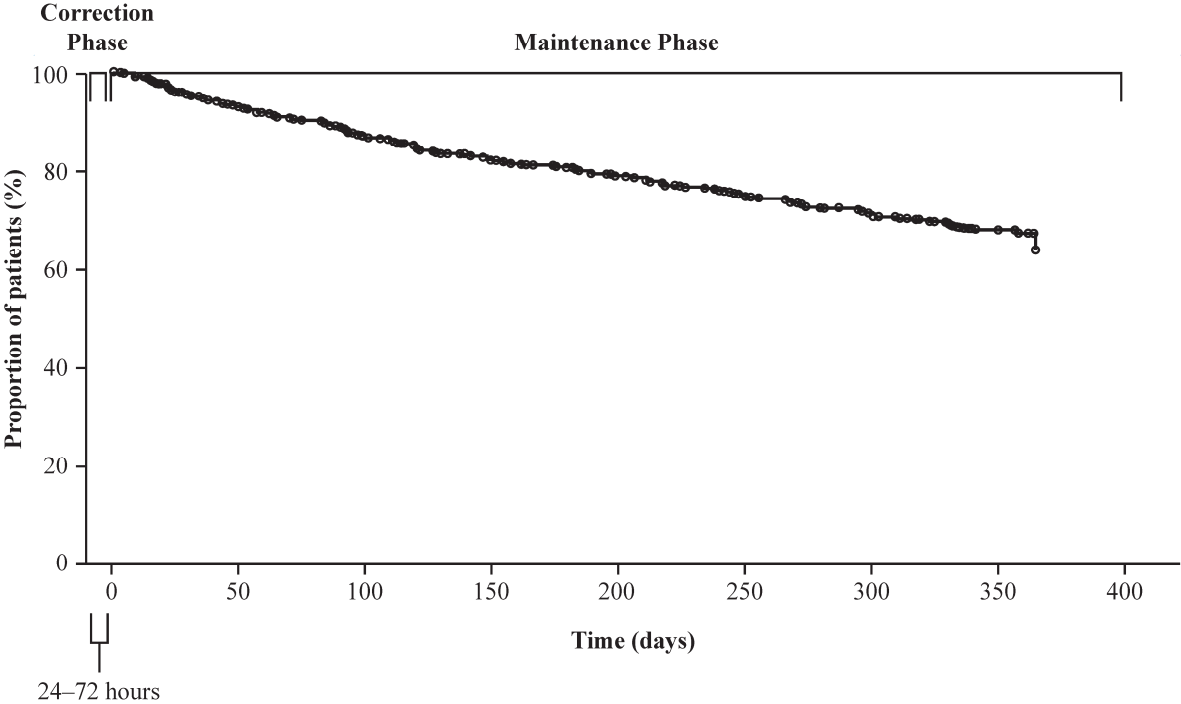

*Supplemental Figure 3. Proportion of participants with an i-STAT K<sup>+</sup> measurement at (A) baseline (n=749) and at (B) 24 (n=748), (C) 48 (n=132), and (D) 72 hours (n=28) during the correction phase.*

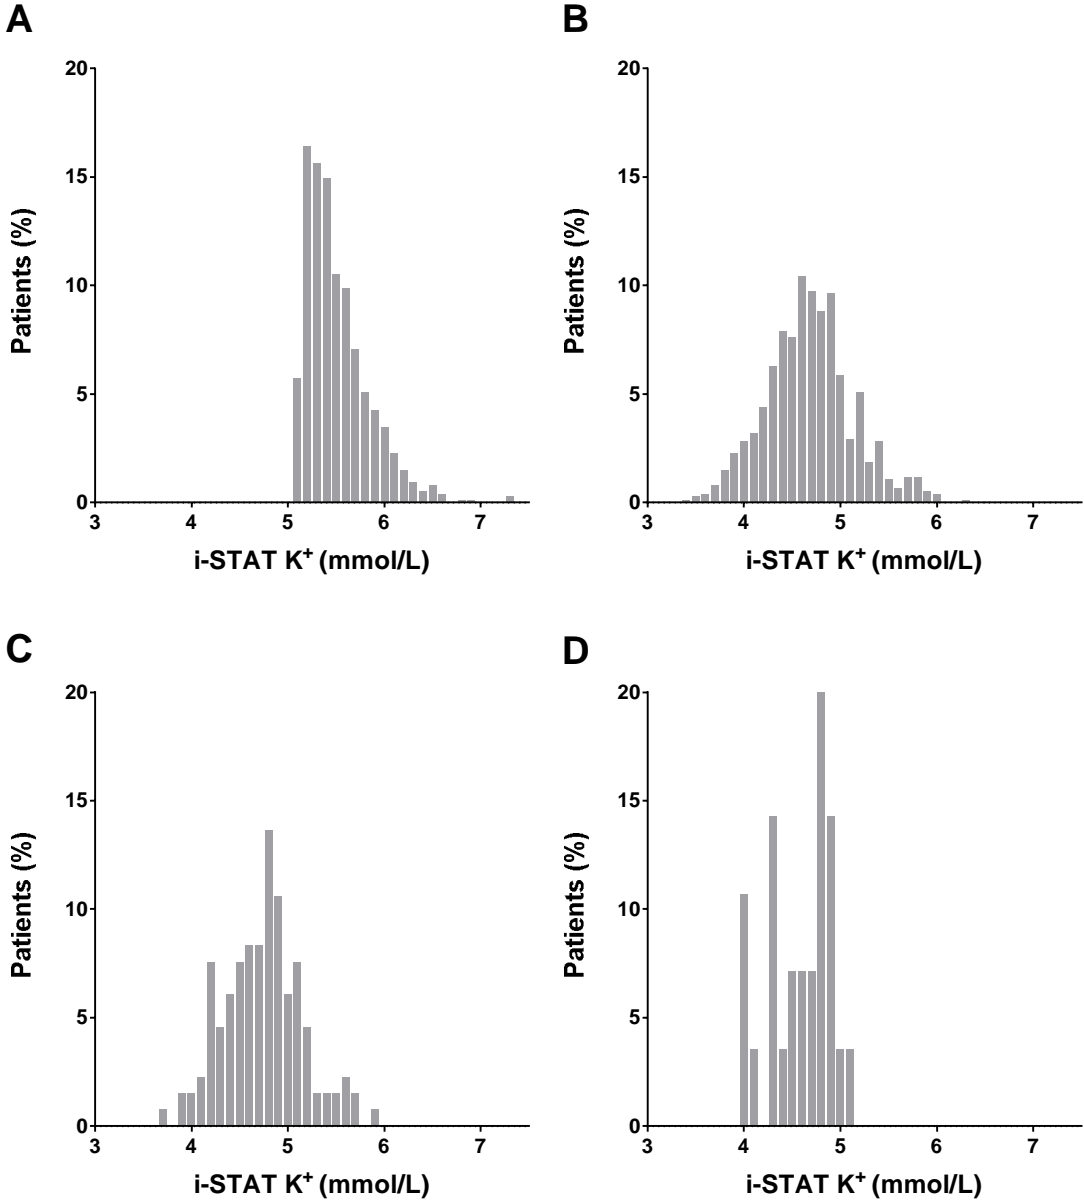

*Supplemental Figure 4. Proportion of participants with a serum K<sup>+</sup> measurement at (A) baseline (n=749) and at (B) 24 (n=748), (C) 48 (n=132), and (D) 72 hours (n=28) during the correction phase.*

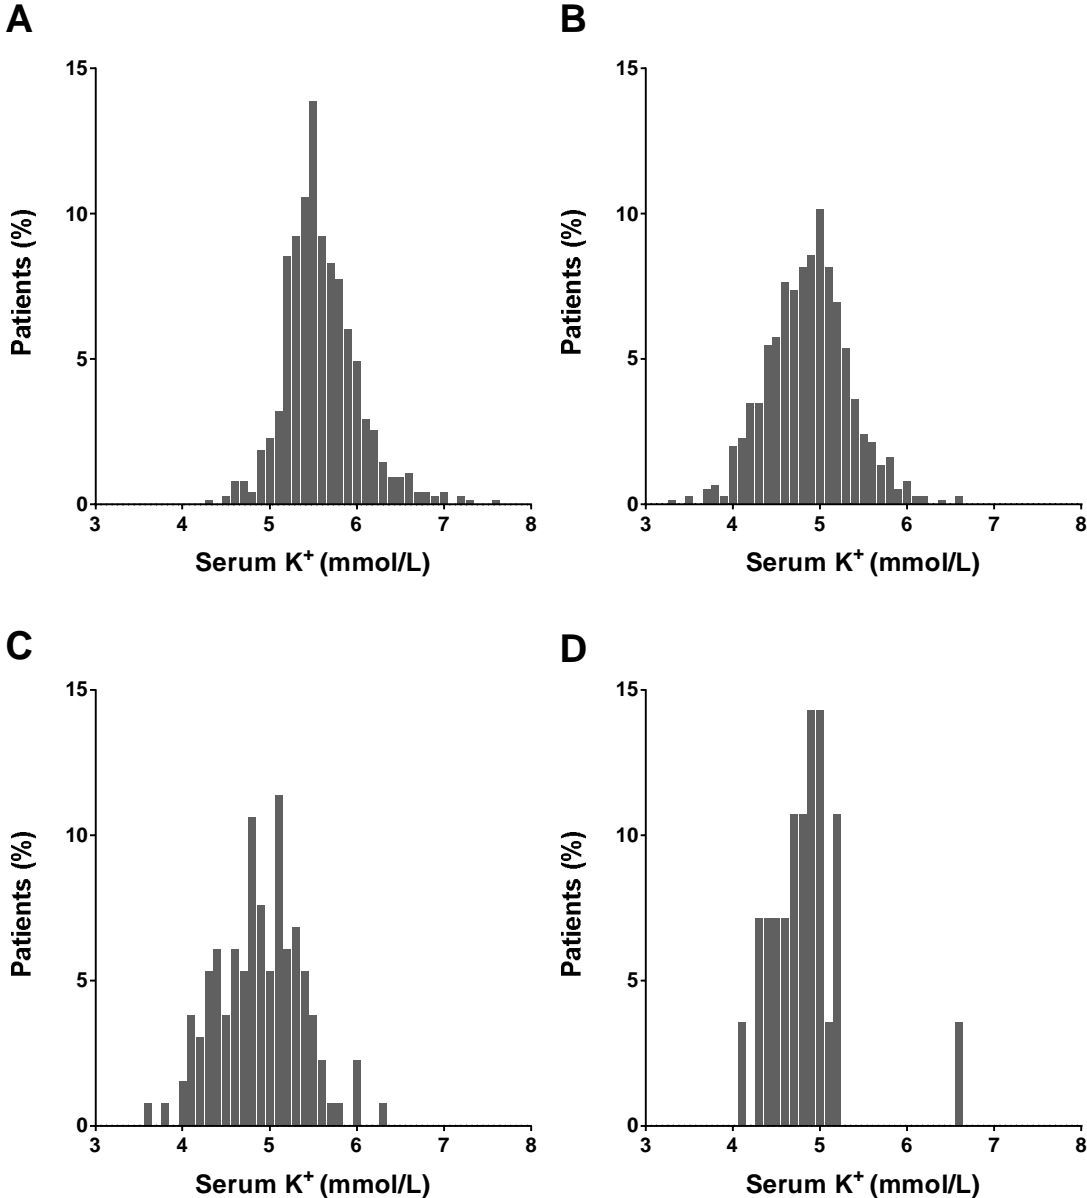

*Supplemental Figure 5. Proportion of participants (N=751) who achieved a mean change in (A) i-STAT K<sup>+</sup> and (B) serum K<sup>+</sup>.*

BL, baseline; CI, confidence interval; CP, correction phase; K<sup>+</sup>, potassium

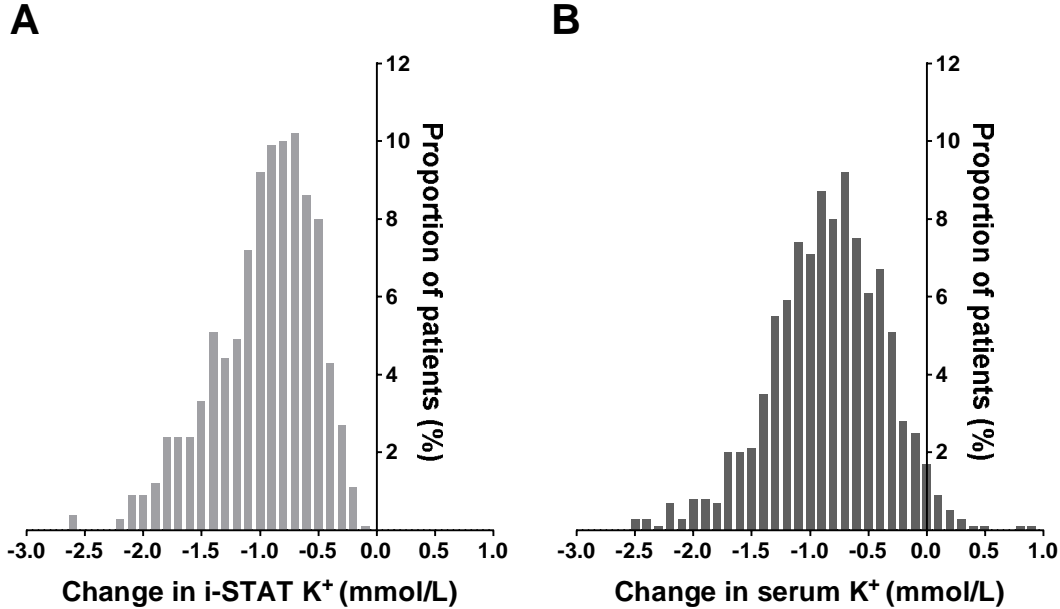

*Supplemental Figure 6. Mean serum bicarbonate levels of participants excluding those who either initiated or had a change (dose/frequency) in sodium bicarbonate therapy during the study.*

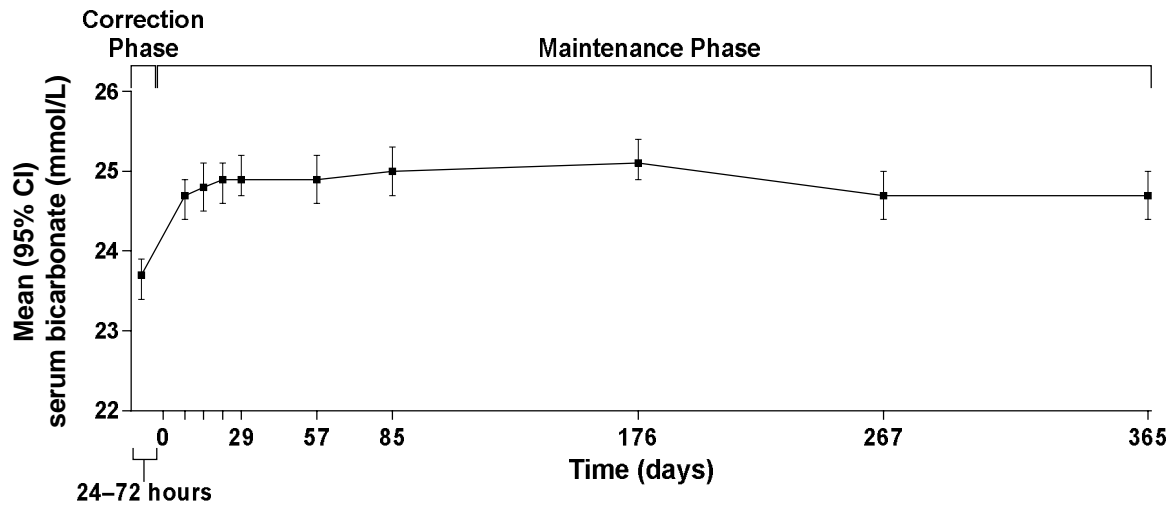

|                           | Day |     |     |     |     |     |     |     |     |  |
|---------------------------|-----|-----|-----|-----|-----|-----|-----|-----|-----|--|
|                           | 8   | 15  | 22  | 29  | 57  | 85  | 176 | 267 | 365 |  |
| n                         | 682 | 672 | 659 | 654 | 628 | 605 | 551 | 492 | 419 |  |
| Nominal $\Delta$ , mmol/L | 1.0 | 1.1 | 1.1 | 1.2 | 1.1 | 1.2 | 1.2 | 0.8 | 0.8 |  |

**Supplemental Figure 7. Correlation between *i*-STAT and serum  $K^+$  measurements in the (A) correction phase and (B) maintenance phases (ITT population<sup>a</sup>).**

<sup>a</sup>The ITT population included all participants who received sodium zirconium cyclosilicate and had a post-baseline  $K^+$  measure during the study phase. The plot for the maintenance phase is representative of 9780 observations. CI, confidence interval; ITT, intention-to-treat;  $K^+$ , potassium.

**A**

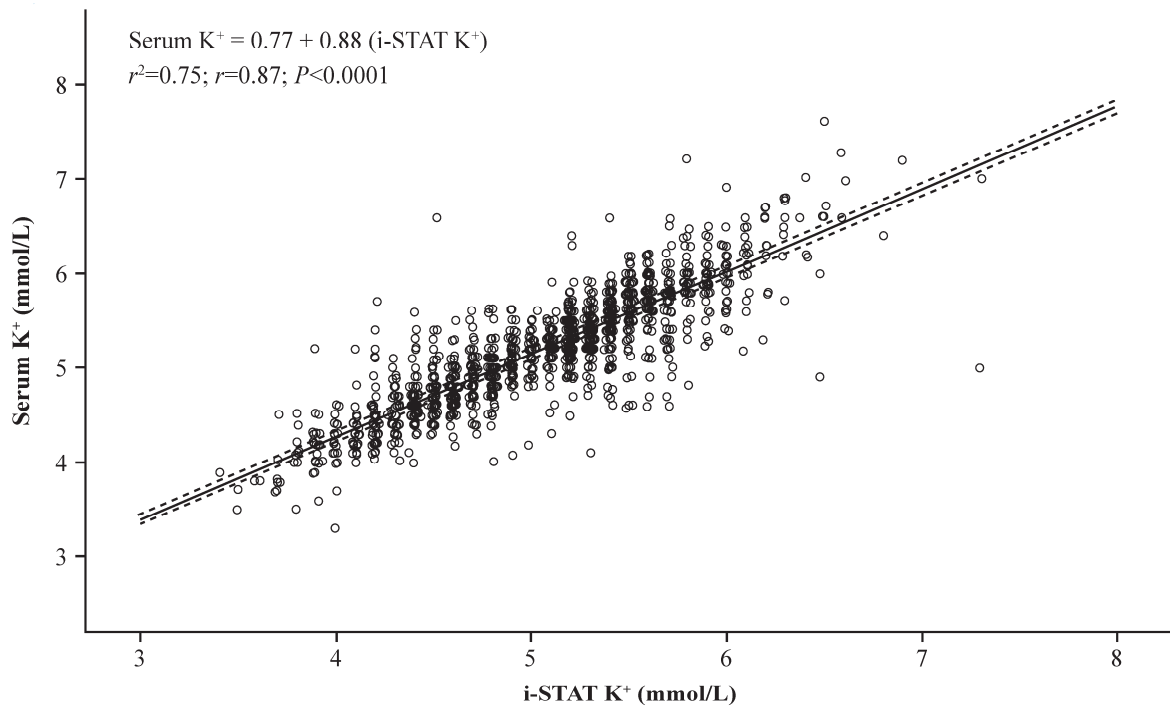

**B**

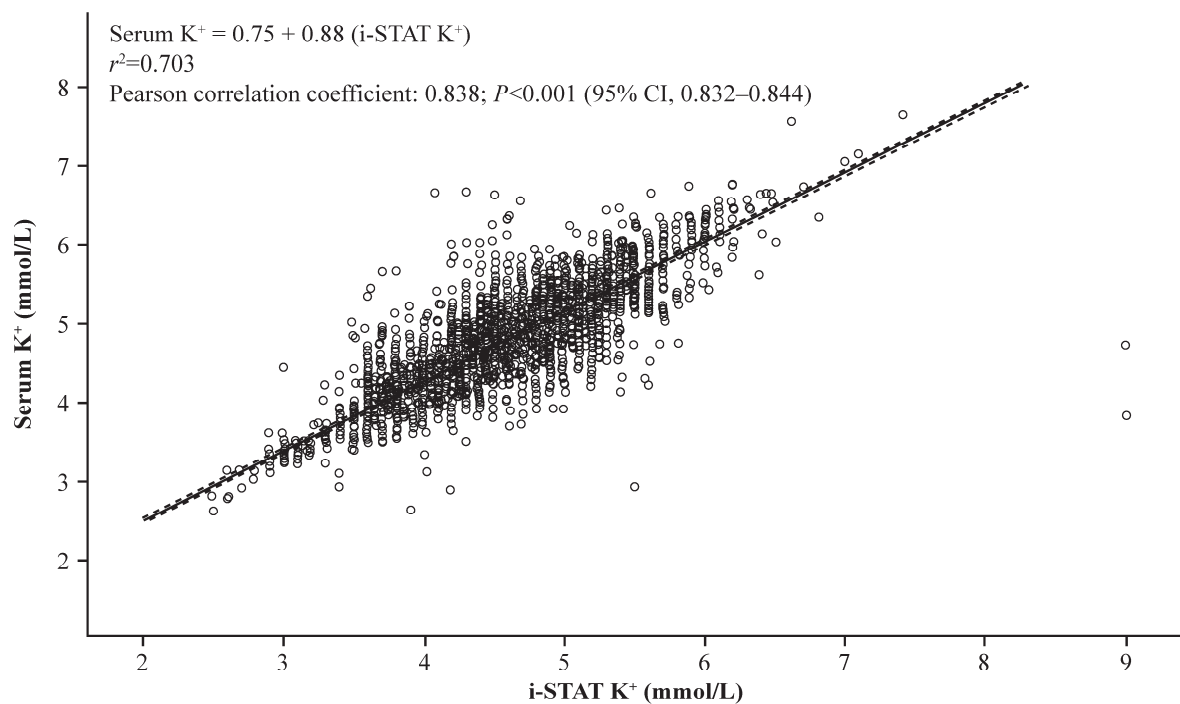



**Supplemental Figure 8. Proportion of participants with *i*-STAT K<sup>+</sup> of (A) ≤5.1 mmol/L, (B) ≤5.5 mmol/L, and (C) 3.5–5.5 mmol/L by visit in the maintenance phase ITT population.<sup>a</sup>**

<sup>a</sup>The ITT population included all participants who received sodium zirconium cyclosilicate and had any postbaseline K<sup>+</sup> values measured during the study phase. Gray bars represent a mean of all visits occurring over months 3–12. CP, correction phase; ITT, intention-to-treat; K<sup>+</sup>, potassium.

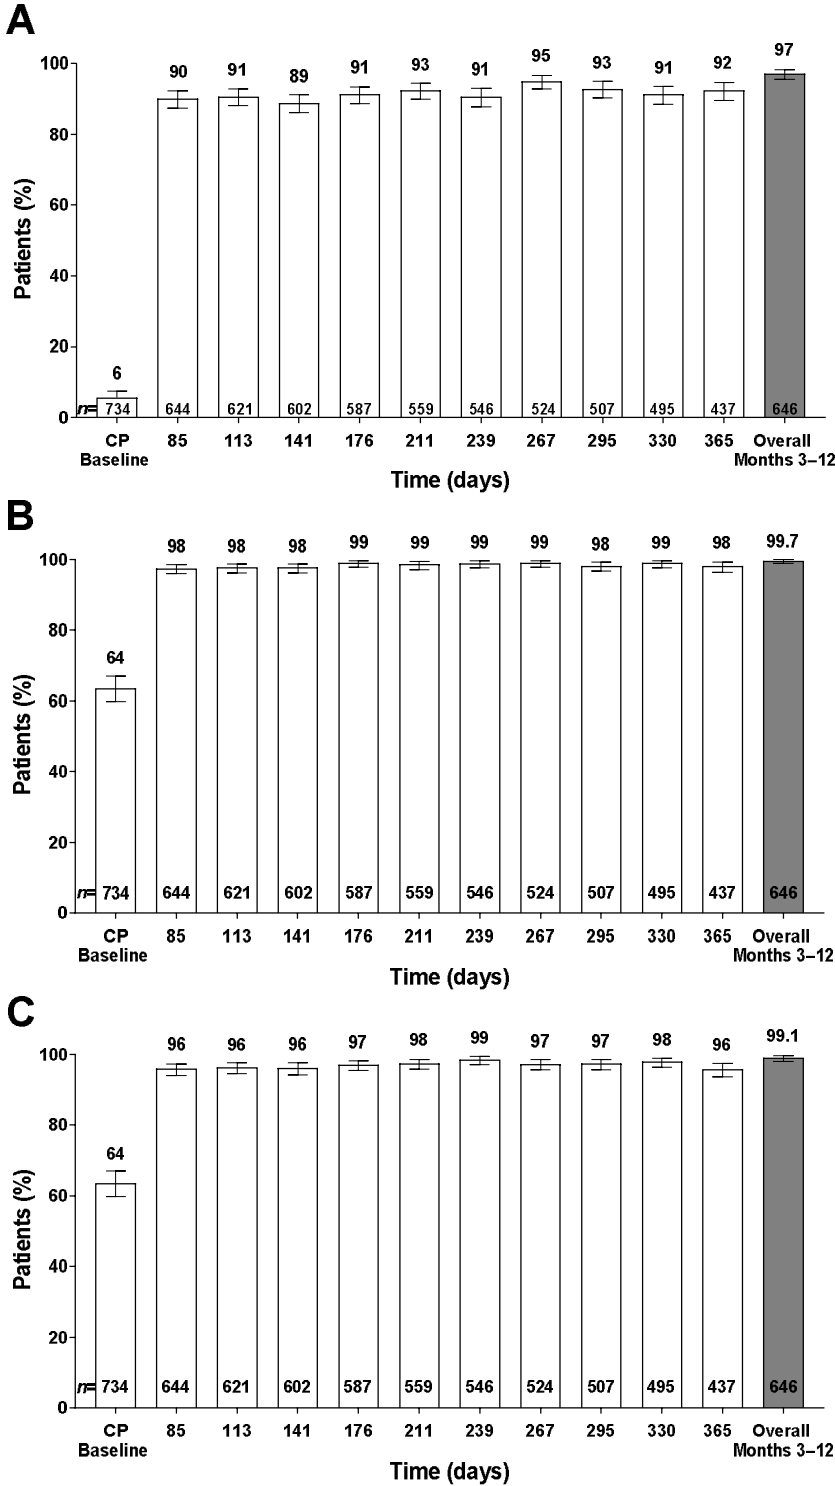

**Supplemental Figure 9. i-STAT K<sup>+</sup> (A) over time<sup>a</sup> and (B) at months 3–12, 6–9, and 9–12<sup>b</sup> in the maintenance phase ITT population.<sup>c</sup>**

<sup>a</sup>For all bars in Panel A,  $P < 0.001$  versus CP baseline. Off-drug values were recorded at 7 ( $\pm 1$ ) days following the last dose of SZC. <sup>b</sup>The median i-STAT K<sup>+</sup> was 5.4 mmol/L at CP baseline, 4.5 mmol/L from months 3–12 and months 6–9, respectively, and 4.4 mmol/L from months 9–12. <sup>c</sup>The ITT population included all participants who received SZC and had any postbaseline K<sup>+</sup> values measured during the study phase;  $\Delta$ , change; CI, confidence interval; CP, correction phase; ITT, intention-to-treat; K<sup>+</sup>, potassium; OD, off drug; SZC, sodium zirconium cyclosilicate.

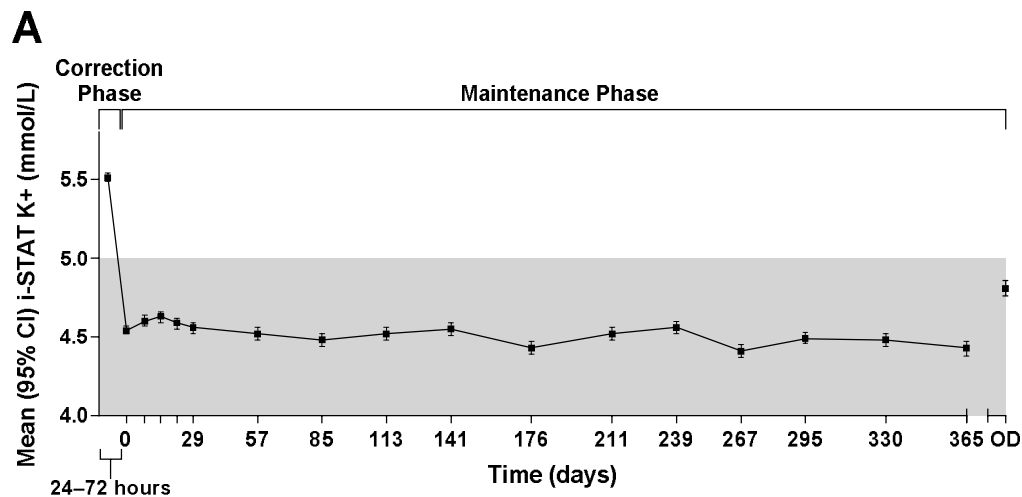

|                           | Day   |       |       |       |       |       |       |       |       |       |       |       |       |       |       |       |       |
|---------------------------|-------|-------|-------|-------|-------|-------|-------|-------|-------|-------|-------|-------|-------|-------|-------|-------|-------|
|                           | 1     | 8     | 15    | 22    | 29    | 57    | 85    | 113   | 141   | 176   | 211   | 239   | 267   | 295   | 330   | 365   | OD    |
| n                         | 734   | 733   | 712   | 705   | 701   | 674   | 644   | 621   | 602   | 587   | 559   | 546   | 524   | 507   | 495   | 437   | 596   |
| Nominal $\Delta$ , mmol/L | -0.97 | -0.91 | -0.89 | -0.92 | -0.95 | -0.99 | -1.03 | -0.99 | -0.96 | -1.07 | -0.98 | -0.95 | -1.09 | -1.01 | -1.03 | -1.07 | -0.71 |
| Percent $\Delta$ , %      | -17   | -16   | -16   | -17   | -17   | -18   | -19   | -18   | -17   | -19   | -18   | -17   | -20   | -18   | -18   | -19   | -13   |

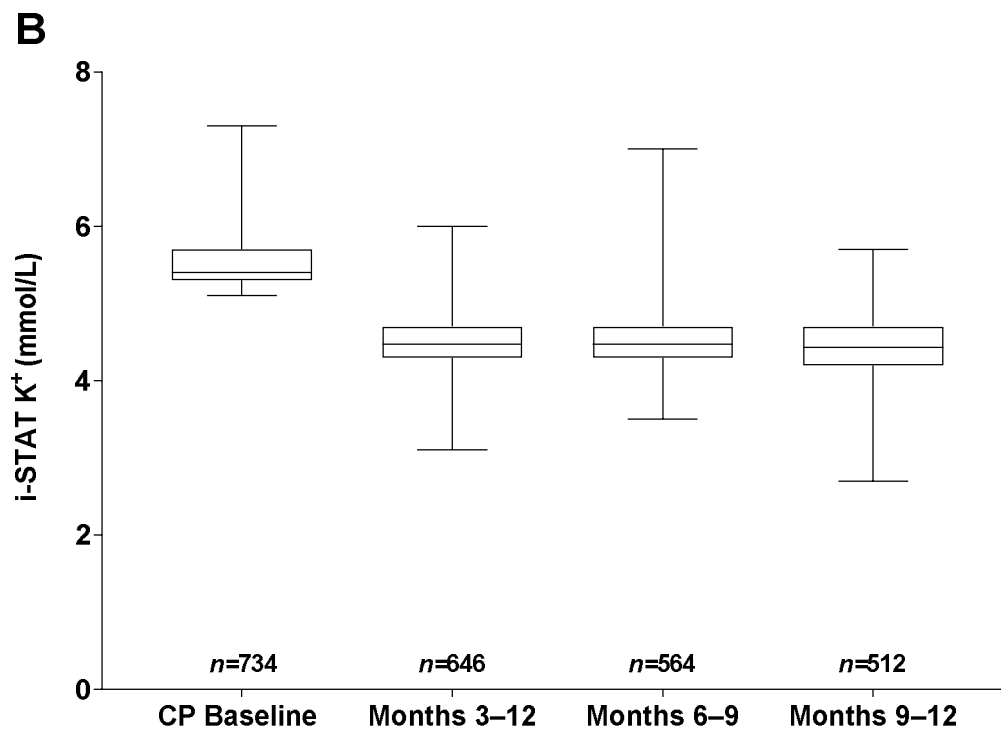

**Supplemental Figure 10. (A) Distribution of SZC dosing per study visit and (B) number of SZC dose modifications (increases or decreases) needed in the maintenance phase safety population.<sup>a</sup>**

<sup>a</sup>The safety population comprised all participants who received  $\geq 1$  dose of SZC during the given study phase and had any postbaseline follow-up for safety. QD, once daily; QoD, every other day; SZC, sodium zirconium cyclosilicate.

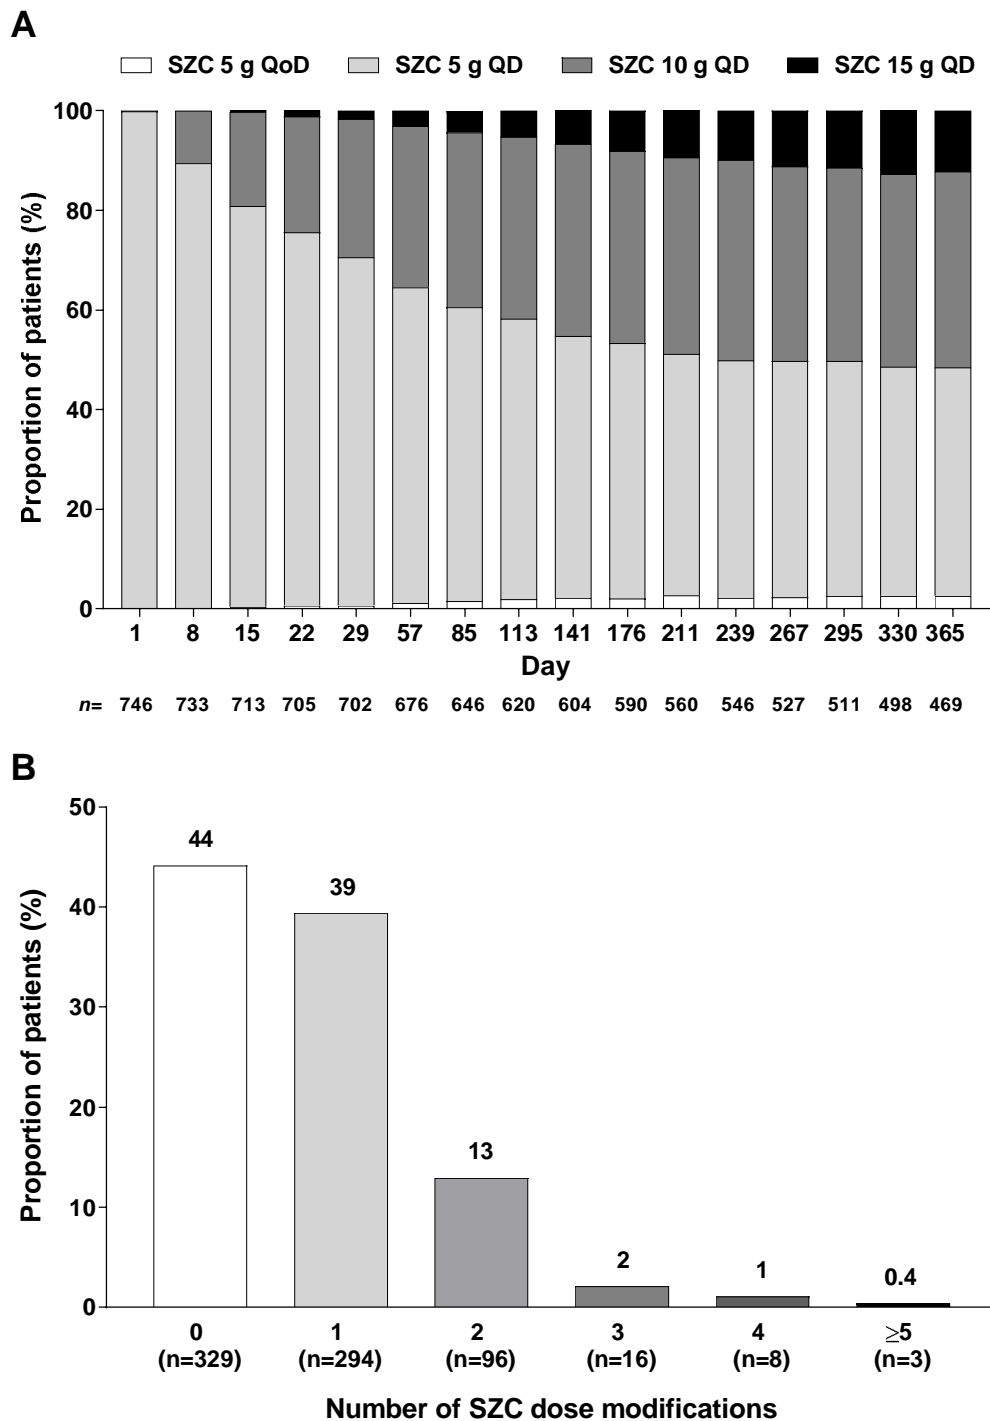

***Supplemental Figure 11. Kaplan-Meier curve for time to events in the hemodynamic edema, effusions, and fluid overload SMQ after SZC dosing in the maintenance phase safety population.<sup>a</sup>***

Study day represents the first occurrence date of an edema SMQ event minus the first dosing date of SZC at MP baseline +1. For participants censored at the end of study, “Study Day” represents the date of study withdrawal/completion minus the first dosing date of SZC at MP baseline +1. <sup>a</sup>The safety population comprised all participants who received  $\geq 1$  dose of SZC during the given study phase and had any postbaseline follow-up for safety. MP, maintenance phase; SMQ, standardized Medical Dictionary for Regulatory Activities query; SZC, sodium zirconium cyclosilicate.

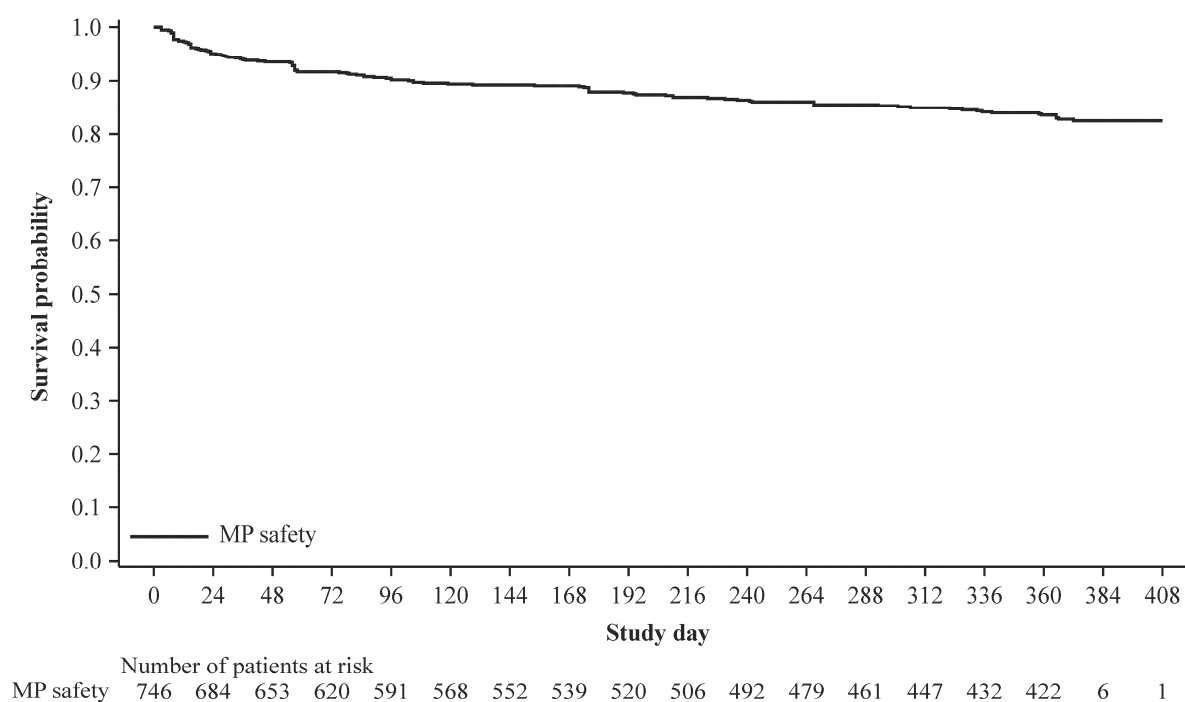

Supplement: CJN.12651018SupplementaryData.pdf [file CJN.12651018SupplementaryData.pdf]
